# Supplementary material for: Leptin receptor neurons in the dorsomedial hypothalamus regulate diurnal patterns of feeding, locomotion, and metabolism
Source: eLife. 2021 Feb 2;10:e63671. doi: 10.7554/eLife.63671 (PMC7880681; doi:10.7554/eLife.63671)
Supplement: Figure 1—source data 1. [file elife-63671-fig1-data1.xlsx]

## Sheet: 1D
Figure 1D - Food Intake	Control						TeTx
Day	7	12	15	2	9		1	3	5	8	10	13	14
-1	3.765	3.4	3.525	4.37	4.615		3.195	3.345	3.415	3.46	3.745	3.975	3.905
0	1.47	2.01	3.05	3.06	1.99		2.15	1.4	2.17	1.64	1.25	2.68	2.04
1	5.84	5.14	6.69	6.61	5.6		7.2	7	8.49	6.03	5.67	6.59	6.29
2	5.74	4.76	4.02	4.25	5.43		7.88	6.72	7.66	5.97	4.2	5.93	9.03
3	4.26	3.33	2.955	3.74	3.56		5.455	4.13	5.86	4.725	2.975	7.3	6.44
4
5	5.11	4.48	5.13	5.68	5.74		4.4	6.33	6.27	6.81	6.61	4.55	7.75
6	3.92	4.24	3.99	4.91	4.86		4.2	4.7	5.52	6.28	6.35	6.65	6.67
7	4.1	3.44	2.91	3.97	3.29		5.01	4.35	4.46	4.72	6.4	4.8	5.57
8
9
10
11
12	5.81	6.15	5.75	6.86	6.02		5.54	5.51	5.68	5.99	6.49	5.66	6.49
13	2.94	3.26	2.41	3.4	3.39		2.43	2.92	3.12	3.2	2.94	4.04	3.8
14
15
16
17
18	3.14	2.78	3.12	3.82	3.52		2.43	2.74	2.86	3.1	2.82	3.45	3.17
19	3.79	3.11	3.98	3.88	4.06		3.85	3.49	3.51	3.24	3.49	3.43	3.98
20	3.6	3.6	3.58	4.05	4.01		3.77	3.92	3.71	3.48	3.65	3.92	4.59
21	3.57	3.36	3.25	3.98	4.12		3.3	3.26	3.79	3.19	3.39	3.41	4.46
22
23
24
25
26
27	4.38572	4.91433	4.15067	4.44378	4.37668		3.79753	3.62217	4.23711	3.07002	4.5639	4.1976	4.03758
28	4.30281	4.2952	3.61615	4.97309	4.38613		3.93203	3.96787	3.95243	3.47789	3.69462	3.49597	3.53619
29
30
31
32
33
34	4.24	4.42	4.47	5.4	5.25		5.09	4.27	3.98	4.7	3.98	4.9	5.18
35	3.85	3.47	3.37	4.51	4.07		4.06	3.63	3.65	3.32	2.96	3.29	4.59

## Sheet: 1E
Figure 1D - week 1 vs week 4 Food Intake
	Control						TeTx
	7	12	15	2	9		1	3	5	8	10	13	14
Week 1	4.82833	4.23167	4.2825	4.86	4.74667		5.69083	5.53833	6.37667	5.75583	5.3675	5.97	6.95833
Week 4	4.34	4.6	3.88	4.71	4.38		3.86	3.8	4.09	3.27	4.13	3.85	3.79

## Sheet: 1F
Figure 1F - body weight (% baseline)
	Control						TeTX
Day	7	12	15	2	9		1	3	5	8	10	13	14
0	100	100	100	100	100		100	100	100	100	100	100	100
1	97.6138	97.7605	98.2382	97.2025	99.6574		97.2688	94.4194	95.8609	94.3145	93.0279	97.9592	95.4403
2	95.1392	96.8464	97.2424	96.8028	96.6167		100.479	97.2547	99.1722	93.4677	91.1355	96.0017	93.5928
3	95.8904	97.1664	97.1658	97.5577	98.8009		102.731	99.1899	104.098	97.4194	88.3466	100.375	95.8726
4
5	99.4255	101.143	97.8169	98.135	100.857		106.948	103.735	109.478	101.089	97.3108	104.581	102.83
6	98.4092	100.457	97.702	97.7798	100.514		110.35	105.176	106.167	101.008	97.4602	107.83	105.621
7
8	99.5139	103.108	98.0467	100.4	102.355		114.614	108.866	111.879	105.282	104.233	110.829	114.505
9	97.6138	98.5832	89.3527	96.2256	97.5589		112.698	107.291	108.444	103.79	101.643	110.371	110.928
10
11
12	101.458	105.073	97.1275	99.0231	103.854		115.621	111.386	111.217	107.944	107.819	115.66	115.409
13	102.209	104.205	98.2382	101.288	103.94		116.243	110.666	112.169	106.855	109.462	115.202	115.252
14	102.077	104.662	97.6254	100.044	103.897		117.968	111.836	111.589	108.347	108.616	117.618	116.863
15
16
17
18	103.27	108.547	97.9701	102.886	105.353		122.568	116.337	114.57	110	113.795	118.95	119.575
19	104.419	108.821	97.8935	103.73	105.139		121.083	115.842	113.452	111.25	113.446	120.533	118.357
20	104.551	108.912	99.4255	103.863	104.882		122.52	115.257	116.184	112.056	113.098	118.992	118.553
21	103.844	109.095	98.0467	102.62	103.983		123.287	116.697	114.942	110.806	114.741	119.534	118.436
22	104.507	108.775	97.8169	102.709	105.054		123.622	116.022	114.735	111.331	115.986	118.201	121.305
23
24
25
26
27
28
29
30
31	106.54	109.735	97.2807	103.641	105.61		128.031	114.986	111.631	110.323	112.45	117.16	122.877
32
33
34	107.512	110.192	99.4638	102.043	106.167		131.337	117.372	112.666	108.71	114.791	119.367	123.899
35	105.656	110.238	99.5404	103.952	107.238		131.96	118.092	114.611	109.516	115.787	119.242	123.781
36	108.131	110.375	99.5021	104.529	106.981		131.96	118.857	113.328	108.71	113.596	119.117	123.939

## Sheet: 1G
Figure 1G - body composition	Control						TeTx
Mass by compartment	7	12	15	2	9		1	3	5	8	10	13	14
Fat	0.89	1.49	1.47	1.39	1.43		3.89	2.99	2.38	3.17	2.89	3.54	5.28
Lean	21.78	21.58	22.65	20.43	21.49		21.62	21.67	23.69	23.14	19.28	23.61	23.91
Total	23.84	24.15	25.53	22.99	24.15		26.95	25.86	27.38	27.71	23.4	28.51	30.55

## Sheet: 1H
Figure 1H - plasma leptin	Control	TeTx
	1.046	3.0635
	1.5435	3.716
	1.398	2.8005
	1.3325	3.7425
	1.4925	3.4645
		4.5625
		6.774
