# Supplementary material for: Leptin receptor neurons in the dorsomedial hypothalamus regulate diurnal patterns of feeding, locomotion, and metabolism
Source: eLife. 2021 Feb 2;10:e63671. doi: 10.7554/eLife.63671 (PMC7880681; doi:10.7554/eLife.63671)
Supplement: Figure 2—source data 1. [file elife-63671-fig2-data1.xlsx]

## Sheet: 2B
Figure 2B - delta body weight	Control	TeTx
	-4.2	-2.82
	-3.8	-2.72
	-3.79	-2.85
	-4.2	-2.6
	-3.57	-2.36
		-2.84
		-2.79

## Sheet: 2C
Figure 2C - food intake	Control - sal					Control - lep					TeTx - sal							TeTx - lep
Time	7	12	15	2	9	7	12	15	2	9	5	8	14	1	3	10	13	5	8	14	1	3	10	13
2	1.1	2.66	1.12	1.39	1.43	1	1.84	1.18	1.08	0.98	1.88	1.57	1.8	1.33	1.41	1.85	1.81	1.77	0.91	1.04	1.45	1.33	1.92	1.44
4	2.25	3.33	2.05	2	2.03	1.3	2.15	1.43	1.22	1.16	2.18	2.23	2.41	2.08	1.84	2.42	2.61	2.51	1.79	1.74	2.01	2.08	2.35	2.22
24	11.26	13.75	12	10.84	9.71	8.21	10.42	9.23	9.04	8.71	10.04	9.17	12.01	8.55	8.47	8.87	7.81	8.35	7.88	8.37	9.81	10.37	10.51	10.02
