# Supplementary material for: Leptin receptor neurons in the dorsomedial hypothalamus regulate diurnal patterns of feeding, locomotion, and metabolism
Source: eLife. 2021 Feb 2;10:e63671. doi: 10.7554/eLife.63671 (PMC7880681; doi:10.7554/eLife.63671)
Supplement: Figure 3—source data 1. [file elife-63671-fig3-data1.xlsx]

## Sheet: 3A
Figure 3A - 2h-binned food intake		Control							TeTx
ZT	Time	6	7	8	2	13	14	9	1	11	12	16	17	18	19
ZT10	1	0.234752	0	0.865828	0.391375	0.417125	0.110861	0.409068	0.922778	0.76297	0.366271	0.397283	0.58026	1.07706	0.629301
ZT11	2
ZT12	3	0.278388	0	1.11206	0.26681	0.452408	0.172356	0.420283	0.552277	0.334565	0.576097	0.380599	0.6462	0.15785	0
ZT13	4
ZT14	5	0.584982	0.720718	0.855953	0.636467	0.615562	0.648229	0.746396	0.996939	0.427197	0.661714	0.528035	0.232405	0.239799	0.100415
ZT15	6
ZT16	7	0.682732	0.949358	0.805078	0.640141	0.668456	0.879067	0.660046	0.001204	0.602873	0.005952	0.429623	0.185049	0.42443	0.683514
ZT17	8
ZT18	9	0.159059	0.689555	0.274727	1.16618	0.539545	0.642458	0.384137	0.463527	0.938413	0.001006	0.328479	0.794313	0.217953	0.628764
ZT19	10
ZT20	11	0.466805	0.1887	0.445351	0.034583	0.779011	0.147759	1.48758	0.277254	0	0.119169	0.305366	0	0.003219	0.407536
ZT21	12
ZT22	13	0.465401	1.23348	2.2294	0.236012	0.602144	0.923639	0.711142	0.402638	0	0.317694	0	0	0	0.353246
ZT23	14
ZT24	15	0.156815	0.162049	0.342298	0.072069	0.08346	0.092334	0.085047	0.176268	0	0.472261	0.264609	0	0.183927	0
ZT1	16
ZT2	17	0	0.003993	0.10961	0.256538	0.089408	0.21827	0.014775	0.748916	0.011718	0.175033	0.35047	0	0.0405	0.194235
ZT3	18
ZT4	19	0.169454	0.050874	0.001427	0.159931	0.163768	0.057953	0	0	0.179345	0.032457	0.104142	0	0.104647	0.119108
ZT5	20
ZT6	21	0	0	0	0.004957	0	0.399838	0.102602	0.188797	0.190732	0.373907	0.367784	0.247302	0.384595	0.299253
ZT7	22
ZT8	23	0.161085	0.015087	0.002505	0.235761	0.787603	0.318298	0	0.163428	0.500986	0.413462	0.404212	0.359887	0.531592	0.385377
ZT9	24
ZT10	25	0.203062	0.004238	0.173248	0.118509	0.135847	0.214875	0.020935	0.437349	0.651981	0.44584	0.593137	0.39275	0.447308	0.441263
ZT11	26
ZT12	27	0.233289	0.003227	1.2113	0.328641	0.181382	0.493103	0.445887	0.248819	0.668772	0.010757	0.619524	0.262471	0.347075	0.782749
ZT13	28
ZT14	29	0.854688	0.94156	0.60471	0.672221	0.719877	1.34931	0.939429	0.726628	0.409304	0.110814	0.69762	0.434678	0.38063	0.076983
ZT15	30
ZT16	31	0.242449	0.879068	0.55887	0.929677	1.04026	0.376839	0.566747	0.666706	0.650276	0.001355	0.09746	0.219619	0.285483	0.42469
ZT17	32
ZT18	33	0.871992	0.750968	0.09554	0.286126	0.564787	0.461135	0.120922	0.226167	0.001535	0.216408	0.263616	0.339551	0.017446	0.347189
ZT19	34
ZT20	35	0.042571	0.588644	0.06386	0.81513	0.368071	1.02588	0.496608	0.112977	0	0.106048	0.362198	0.254386	0.019594	0.365295
ZT21	36
ZT22	37	0.614098	0.6832	0.69871	0.193075	0.814131	0.510914	0.534718	0.216331	0.000182	0.413421	0.237409	0	0.137139	0.165112
ZT23	38
ZT24	39	0.197782	0.114672	0.08912	0.146187	0	0.104199	0.019701	0.87111	0.00253	0.289914	0.77433	0.333849	0.034681	0.012264
ZT1	40
ZT2	41	0	0.131238	0.01405	0.002626	0.00319	0	0.243073	0	0	0.152227	0.084996	0.483766	0.002075	0.206789
ZT3	42
ZT4	43	0.157681	0.089902	0.15793	0.0152	0.00943	0.301473	0.207848	0.07699	0.204672	0.07756	0	0.223227	0.162903	0
ZT5	44
ZT6	45	0	0.195283	0	0.149963	0.16558	0.17974	0	0	0	0.814665	0.006867	0.586456	0.128203	0
ZT7	46
ZT8	47	0.15316	0.163022	0.00491	0.187588	0.12901	0.28935	0.099846	0.212749	1.10014	0	0.629695	0.279701	0.446666	0.560568
ZT9	48
ZT10	49	0.739172	0.211521	0.00132	0.2631	0.32219	0.49491	0.249207	0.297957	0.197434	0.573553	0.268231	0.350684	0.692172	0.254059
ZT11	50
ZT12	51	0.044348	0.467932	0.33823	0.368105	0.74856	0.40544	0.360539	0.62535	0.662521	0.659142	0.312302	0.292964	0.494033	0.561536
ZT13	52
ZT14	53	0.755657	0.679633	0.57496	0.75623	0.33479	1.2059	0.72204	0.79067	0.122168	0.302953	0.177288	0.19868	0.274263	0.991665
ZT15	54
ZT16	55	0.39181	0.95811	0.23275	0.32815	0.30474	1.62457	0.58102	0.41779	0	0.130227	0.386829	0.319139	1.09373	0.00941
ZT17	56
ZT18	57	0.270667	0.5801	0.20031	0.23441	0.63265	0.31484	0.59103	0.59933	0.63011	0.87735	0.355782	0.226805	0	0.00157
ZT19	58
ZT20	59	0.467427	0.48421	0.4637	0.6486	0.47873	0.15577	1.10152	0	0.232962	0.016968	0.77095	0.23966	0.067502	0.43378
ZT21	60
ZT22	61	1.04588	1.16746	0.74008	0.22835	0.55856	0.87319	0.38397	0.23872	0.56896	0.007095	0.05127	0.177917	0.49088	0.24573
ZT23	62
ZT24	63	0.07923	0.0294	0.15788	0.34056	0.02205	0.13044	0	0.18883	0	0.220613	0.11425	0	0	0.02517
ZT1	64
ZT2	65	0	0	0	0.10545	0	0.19108	0.00495	0.02146	0	0.219967	0.1788	0.203123	0	0
ZT3	66
ZT4	67	0.00305	0.0316	0.01504	0	0.1056	0.16018	0.01406	0	0	0.246026	0.00181	0.240259	0.686192	0.11691
ZT5	68
ZT6	69	0	0	0.20378	0.00109	0	0.16179	0.16628	0.00223	0.00231	0.32431	0.16436	0.307856	0	0.04947
ZT7	70
ZT8	71	0	0.15998	0.16045	0.19442	0.20143	0.18254	0	0.16863	0.43838	0	0.61604	0.44164	0.46842	0.30735
ZT9	72
ZT10	73	0.15031	0.12384	0.28964	0.19995	0.26387	0.59124	0.81934	0.47131	0.53869	0.16713	0.88062	0.72942	0.56183	0.39108
ZT11	74
ZT12	75	0.29754	0.11094	0.48446	0.43124	0.83534	0.27055	0.00239	0.28609	0.47975	0.40613	0.29452	0.25713	0.1948	0.6771
ZT13	76
ZT14	77	0.81986	0.77152	0.45997	0.9702	0.20772	1.40694	0.49207	0.74099	0.28017	0.42469	0.0191	0.12798	0.52479	0.26697
ZT15	78
ZT16	79	0.50959	0.82978	0.01055	0.26602	0.35867	0.50159	0.51185	0.83283	0.11292	0.33152	0.62694	0.25607	0.33757	0.04752
ZT17	80
ZT18	81	0.36078	0.43218	0.4518	0.26742	0.47206	0.92829	0.43372	0	0.35942	0.26448	0.27665	0.01841	0.66111	0.28973
ZT19	82
ZT20	83	0.69298	0.04651	0.62935	0.42217	0.15541	0.36244	0.49306	0.39546	0	0.16378	0.38054	0.21881	0.19322	0.4028
ZT21	84
ZT22	85	0.60859	0.87563	0.98231	0.48426	0.22293	0.84308	1.1889	0.18332	0.12226	0.33693	1.09803	0.12552	0.31117	0.36548
ZT23	86
ZT24	87	0.13194	0.09225	0	0.29789	0	0.19775	0	0.16047	0	0.22353	0	0.39713	0.02442	0.02569
ZT1	88

## Sheet: 3B
Figure 3B - food intake	Control							TeTx
Photoperiod	6	7	8	2	13	14	9	1	11	12	16	17	18	19
Dark	2.95	3.81	3.12	3.06	2.85	4	3.61	2.16	1.48	1.24	1.97	1.16	1.52	1.98
Light	0.98	0.76	1.41	1.3	1.64	1.88	0.99	1.89	2.06	2.21	2.5	2.16	2.07	1.99
Total	3.92	4.57	4.53	4.36	4.49	5.89	4.6	4.05	3.54	3.45	4.48	3.32	3.6	3.97

## Sheet: 3C
Figure 3C - 2h-binned locomotor activity		Control							TeTx
ZT	Time	6	7	8	2	13	14	9	#1	#11	#12	#16	#17	#18	#19
ZT10	1	2649.53	5726.14	5634	5525.6	4848.8	3885	4970.93	4386.8	2575.93	3763.73	3833.87	2714.67	4359.07	1987.6
ZT11	2
ZT12	3	2337.93	1332.73	4316.53	3123.07	2292.8	1834.47	2033.53	2539.33	1765	2901.59	3631.67	2434.8	3487.93	2373.13
ZT13	4
ZT14	5	5401.21	6206.47	6040.14	5751.61	5508.86	6062.05	5660.87	4202.07	1449.4	2070.53	2357.87	596	2454	2777.6
ZT15	6
ZT16	7	3885.67	4768.59	5599.33	3253.6	4238.2	5449.66	3325.39	806	2065.47	1713.2	1408	931	1975.34	1719.19
ZT17	8
ZT18	9	2353.14	5999.73	1494.13	5620.34	2195.87	5206.74	1801.34	2335.87	1697.34	1799	669	1603.2	1159.93	2525.8
ZT19	10
ZT20	11	3857.87	544	1252	5540.27	4007.27	1416.19	4057.26	763.87	514	1310.33	1085.4	1077.47	1316.13	2699.73
ZT21	12
ZT22	13	4427.33	3950.66	5182.93	2478.13	4046.06	4854.67	7232	2782.87	616.33	942.13	500.6	1297	757.47	1648.47
ZT23	14
ZT24	15	4399.47	4583.4	4189.07	1187.13	3565.4	893.8	2241.2	1247.46	472.73	1851.33	1301.27	1184.2	1726.8	766.67
ZT1	16
ZT2	17	627	904	2356.19	2598.13	1903.07	1659.6	1290.73	2150.33	561.73	1010.8	928.34	1707	962.93	615.26
ZT3	18
ZT4	19	1495	2075.94	1129.27	1227.94	1830.54	1396	1161.27	626.73	1041.53	1038.73	1528	1123.07	629.8	1690.6
ZT5	20
ZT6	21	517.93	829.73	1014.41	654.74	811.47	1849	1430.2	1869.8	995.2	1651.87	1537.2	3095.19	1910	1647.87
ZT7	22
ZT8	23	1418.13	1318.67	1213.67	1943	1271.93	1482.4	444	2297.6	1237	1719.4	1117.67	1726	3151.99	1535.8
ZT9	24
ZT10	25	1979.4	1408.6	2695.54	720.46	1871.54	956.27	1384	1707.26	2792.66	1641.6	1493.67	1646.86	2613.26	2030
ZT11	26
ZT12	27	1236	1393.13	1766.26	1965.93	1246.8	1167.66	2122.6	1834.94	1600	1174.73	1484.27	1232.33	2802.47	1779.8
ZT13	28
ZT14	29	4284.14	6057.47	4689.6	5014.2	3934.87	4701	4790.81	4129.01	1766	2040	2636.8	2877.87	1701.94	3235.8
ZT15	30
ZT16	31	3017.54	6083.4	4490.93	6587.46	2890.6	3633.6	3864.94	2305.74	1495.06	894.87	922.93	795.33	1154.54	2384.93
ZT17	32
ZT18	33	1686.27	5370.87	1218.93	3846.73	3985.33	3488.6	2749.08	1708	1548	2107.93	1499.53	1831.59	2257	1498.06
ZT19	34
ZT20	35	1592.54	1018	2161.87	3537.87	2189.53	2412.33	4253.07	1415.13	1137.8	618.2	1789.6	1505.54	2016.4	2226.46
ZT21	36
ZT22	37	4464.2	5281.41	4698.46	3314.26	5611.86	3307.33	5138.87	1261.93	1349.27	1567.93	1401.33	859.8	1052.54	1818.6
ZT23	38
ZT24	39	4240.6	3003.66	4132.04	4035.8	2648.8	2282.07	3016.73	2969.67	773	1095.07	1418.2	2466.6	1108.46	1523.4
ZT1	40
ZT2	41	543	1682.53	3300.67	1869.4	614	744.47	2029.47	1662.4	366.87	1897.13	1200.8	1853.33	925	1187
ZT3	42
ZT4	43	2438.87	1597.8	1259	1897	2021.73	1471	1564.73	1023.54	1909.46	1387.27	901	1887	1061.27	488.2
ZT5	44
ZT6	45	191	1757	613	2649.87	1141	1270	699.4	1059.4	898.13	2213.27	1184	3379.61	1490.59	1773
ZT7	46
ZT8	47	1472.2	1142.2	1144.53	1960.54	1855.07	1452.8	1865.66	2369.07	2364.54	2000.87	1304.27	1113	1587.2	1803.53
ZT9	48
ZT10	49	1177.81	1180.8	489.6	1758	1329	1843.87	945	1973.66	1192.61	1339.31	1221.46	1319.66	3211.87	2472.27
ZT11	50
ZT12	51	940.34	1933.59	1542.2	2110	1278	1241.8	1550	2155.67	2478.46	2928.8	2406.73	2421	2163	1087.66
ZT13	52
ZT14	53	5484.34	4172.07	5107	4566.6	4222.94	3717.66	3593.67	2676.06	928.33	1895.4	1663	1035.73	1409.2	2385.27
ZT15	54
ZT16	55	2284.2	5843.39	2048.74	3602.7	2084.34	3941.13	2974.4	1202	892.33	1065.2	1837.6	1276	2490	1696.93
ZT17	56
ZT18	57	2227.4	4683.47	1867.13	2750.7	2900.4	2911.14	3160.31	1717.53	2897.67	1171	2591.73	2448	496.73	1581.86
ZT19	58
ZT20	59	2450.27	2453.3	2448.46	4802.9	1196.33	1640.13	4738.54	658	1182.4	1932.67	1424.6	1474.2	1396.54	2051.73
ZT21	60
ZT22	61	4140.53	4625.7	4379.83	2732.8	6535.73	3560.12	4900.43	3406.87	1946.13	1517.73	1109.07	1714.26	2376.47	1921.87
ZT23	62
ZT24	63	3152.81	4057	4102.1	3979.2	4624.13	1849	3265.2	2917.34	1232	1176	1505.93	509.73	543.87	616.87
ZT1	64
ZT2	65	1305.2	618	661	1088	434	1662.47	1260	1581.73	1160	984	649.8	2579.6	594	767
ZT3	66
ZT4	67	822	2425.7	1407.7	604.8	2095.7	1230.59	891.4	579.81	1098.66	1550.2	1010.54	1791.07	1144	1377.34
ZT5	68
ZT6	69	764.87	577	824.4	583	357	516	1408	2393.87	1807.46	1645.47	1933	1684.81	1824.4	1921.6
ZT7	70
ZT8	71	734.27	1821.4	604	1877.7	1524.7	1777	373.5	1390.8	2279.2	2188.93	1887.91	3375.87	2196.47	2414.93
ZT9	72
ZT10	73	1868.47	1799.7	1518	1422.7	1811.1	1588	2693	2997.66	2171.73	2568.6	1676.87	1149.27	2707.67	1422.13
ZT11	74
ZT12	75	1299.7	1625.5	1940	1504	1958.7	1357.2	1099	1544.13	2377.98	1589	1347.46	2801.67	1512.4	1799
ZT13	76
ZT14	77	3628	5808.6	4289.9	4167.9	3052	3989.9	3023.5	3427.2	1995	2774.6	1918.08	978.47	1375	1860.54
ZT15	78
ZT16	79	4132.4	4198.8	1540.6	2225	1744.7	2633.2	2699.5	1573.13	1776.26	1013.19	1340	1346.21	1549.47	2282
ZT17	80
ZT18	81	3239	3567.1	2604.5	3694.6	2088.2	4691.7	3087.9	1132.31	1877.87	835	1119	484.19	614.87	1243.69
ZT19	82
ZT20	83	2570.5	757.4	2201.9	2280.6	2902.5	1273.8	3164.6	1494.13	834	1445.61	2444.27	1992.07	3018.13	1857
ZT21	84
ZT22	85	3811.1	5756.9	4388.2	3589	4670.5	4267.6	4809.1	1415.4	1805.86	1910	1565.6	893.34	1459.27	2433.47
ZT23	86
ZT24	87	3469.3	2979.9	2974.2	253	3566.2	1031.3	1215	879.27	285	977	304	1094	571.66	1508.66
ZT1	88

## Sheet: 3D
Figure 3D - locomotor activity	Control							TeTx
Photoperiod	#6	#7	#8	#2	#13	#14	#9	#1	#11	#12	#16	#17	#18	#19
Dark	18526.6	23359.6	18273.9	21337.5	19056.8	19832.9	21591	10896.2	8078.06	8332.82	8442.37	7286.02	8706.74	11387.8
Light	12088.5	13668.1	13701.3	13742.7	13056.9	10696.9	11973.5	14092.1	11097.6	12397.1	10286.7	14128.4	13034.2	11133.3
Total	30615.2	37027.7	31975.2	35080.2	32113.7	30529.8	33564.5	24988.3	19175.7	20730	18729.1	21414.4	21740.9	22521.1

## Sheet: 3E
Figure 3E - 2h-binned heat production		Control							TeTx
ZT	Time	#6	#7	#8	#2	#13	#14	#9	#1	#11	#12	#16	#17	#18	#19
ZT10	1	0.427949	0.426616	0.383549	0.521143	0.501437	0.44792	0.468211	0.381869	0.430996	0.500755	0.394105	0.396831	0.509932	0.485398
ZT11	2
ZT12	3	0.388151	0.289323	0.367336	0.426168	0.405883	0.35176	0.347411	0.369789	0.362454	0.457405	0.365232	0.36674	0.471798	0.47231
ZT13	4
ZT14	5	0.491857	0.447507	0.433585	0.539301	0.515165	0.519182	0.470974	0.390743	0.365051	0.401319	0.337188	0.311126	0.426992	0.483917
ZT15	6
ZT16	7	0.494192	0.428648	0.405238	0.495962	0.489692	0.5096	0.434601	0.327013	0.386869	0.355648	0.334894	0.309084	0.403085	0.457093
ZT17	8
ZT18	9	0.402193	0.493111	0.333893	0.563134	0.41035	0.493842	0.391179	0.348354	0.361558	0.377061	0.317379	0.341645	0.39686	0.481716
ZT19	10
ZT20	11	0.497839	0.266513	0.320713	0.498766	0.512167	0.3586	0.447814	0.308888	0.318489	0.346233	0.312587	0.314357	0.423276	0.465234
ZT21	12
ZT22	13	0.46431	0.422147	0.390676	0.455577	0.487615	0.478969	0.470762	0.349033	0.306601	0.331072	0.273661	0.300671	0.351189	0.42035
ZT23	14
ZT24	15	0.395501	0.422808	0.370691	0.424706	0.4131	0.310385	0.365179	0.3298	0.28553	0.380089	0.30532	0.29543	0.400275	0.362033
ZT1	16
ZT2	17	0.3214	0.270974	0.315062	0.418162	0.376614	0.348655	0.328133	0.33887	0.300775	0.358272	0.292417	0.297872	0.340456	0.380043
ZT3	18
ZT4	19	0.352697	0.288095	0.291672	0.386722	0.38134	0.306057	0.320278	0.297226	0.309918	0.348881	0.303092	0.288991	0.335459	0.412957
ZT5	20
ZT6	21	0.312222	0.270962	0.289573	0.360676	0.33755	0.347751	0.321751	0.294588	0.314123	0.385578	0.314766	0.382236	0.417077	0.400701
ZT7	22
ZT8	23	0.352065	0.277764	0.296955	0.398032	0.361871	0.314376	0.293684	0.308673	0.36877	0.404141	0.316662	0.320598	0.467218	0.440226
ZT9	24
ZT10	25	0.375989	0.297594	0.294038	0.368793	0.402423	0.301253	0.324047	0.306745	0.419258	0.406179	0.329916	0.352512	0.440069	0.397133
ZT11	26
ZT12	27	0.320211	0.299244	0.300186	0.415781	0.376306	0.342139	0.357937	0.312532	0.407675	0.418526	0.336021	0.362597	0.48073	0.446519
ZT13	28
ZT14	29	0.502945	0.480863	0.390309	0.533797	0.498016	0.515634	0.431103	0.375637	0.41001	0.437532	0.368535	0.404935	0.429991	0.494994
ZT15	30
ZT16	31	0.410516	0.498706	0.377462	0.541656	0.467473	0.447021	0.430323	0.357273	0.382486	0.362186	0.310345	0.303738	0.390967	0.44916
ZT17	32
ZT18	33	0.378195	0.470746	0.320323	0.482303	0.497284	0.437248	0.399195	0.324812	0.383026	0.40127	0.335191	0.369063	0.465765	0.41116
ZT19	34
ZT20	35	0.385872	0.290377	0.339767	0.467846	0.454008	0.40462	0.430386	0.333729	0.334934	0.354371	0.345538	0.352474	0.438019	0.470732
ZT21	36
ZT22	37	0.476425	0.454792	0.369713	0.507896	0.545751	0.458862	0.439243	0.28419	0.324634	0.391881	0.328713	0.292376	0.373362	0.463034
ZT23	38
ZT24	39	0.447624	0.326179	0.354679	0.454878	0.400516	0.357489	0.362837	0.379324	0.317341	0.374813	0.305193	0.352483	0.372479	0.399079
ZT1	40
ZT2	41	0.311808	0.277679	0.311221	0.408828	0.340605	0.306838	0.327681	0.33357	0.263055	0.40555	0.304546	0.302053	0.360285	0.408346
ZT3	42
ZT4	43	0.348974	0.321732	0.281181	0.396206	0.363123	0.325721	0.310959	0.292781	0.324016	0.351021	0.295852	0.310682	0.359731	0.35167
ZT5	44
ZT6	45	0.294778	0.287122	0.266418	0.380041	0.3395	0.301763	0.298467	0.316293	0.306099	0.408254	0.316013	0.383978	0.361885	0.406203
ZT7	46
ZT8	47	0.345218	0.276571	0.265468	0.389336	0.37176	0.314183	0.324527	0.279536	0.39493	0.416386	0.291319	0.309918	0.412315	0.409298
ZT9	48
ZT10	49	0.329942	0.309288	0.272874	0.380451	0.336824	0.33749	0.296745	0.290237	0.358952	0.380069	0.32638	0.348243	0.494612	0.458235
ZT11	50
ZT12	51	0.350049	0.296201	0.290712	0.417138	0.369023	0.325786	0.335487	0.320662	0.435292	0.479636	0.368698	0.386128	0.433165	0.422989
ZT13	52
ZT14	53	0.538157	0.426215	0.387469	0.512174	0.498625	0.455769	0.425829	0.366231	0.343859	0.43163	0.327944	0.338797	0.419678	0.482458
ZT15	54
ZT16	55	0.414204	0.51258	0.330385	0.526724	0.420797	0.463715	0.407531	0.315718	0.315385	0.386226	0.321878	0.353097	0.451559	0.433691
ZT17	56
ZT18	57	0.438057	0.454334	0.337131	0.475452	0.433451	0.422569	0.403716	0.355552	0.403329	0.374264	0.342999	0.392246	0.375926	0.419629
ZT19	58
ZT20	59	0.41807	0.355368	0.332993	0.521287	0.420702	0.388025	0.42901	0.300795	0.34929	0.435133	0.346321	0.324058	0.403143	0.453499
ZT21	60
ZT22	61	0.502817	0.419245	0.382318	0.463894	0.562021	0.464947	0.419141	0.344794	0.352017	0.386574	0.306207	0.310272	0.449908	0.451052
ZT23	62
ZT24	63	0.38355	0.37847	0.339813	0.479672	0.437923	0.35061	0.360884	0.296859	0.32631	0.373289	0.309034	0.268812	0.351885	0.366875
ZT1	64
ZT2	65	0.364991	0.281663	0.266038	0.423392	0.322405	0.348643	0.325698	0.283389	0.292068	0.37469	0.28467	0.383004	0.323772	0.352174
ZT3	66
ZT4	67	0.323463	0.284534	0.289791	0.387345	0.378975	0.322456	0.32212	0.255903	0.29808	0.36366	0.300867	0.303031	0.377926	0.37841
ZT5	68
ZT6	69	0.31417	0.246246	0.27725	0.35942	0.308929	0.314764	0.310493	0.29696	0.356469	0.414107	0.308191	0.344499	0.391156	0.38012
ZT7	70
ZT8	71	0.331238	0.284964	0.269825	0.405278	0.374574	0.347289	0.284068	0.276916	0.369762	0.413197	0.337519	0.385033	0.416683	0.412049
ZT9	72
ZT10	73	0.367223	0.284481	0.291612	0.405724	0.377496	0.349376	0.349528	0.306116	0.383885	0.459193	0.326721	0.373818	0.451	0.395443
ZT11	74
ZT12	75	0.3596	0.275289	0.296348	0.411636	0.39422	0.352263	0.316442	0.303567	0.389083	0.424807	0.331592	0.383451	0.404446	0.450842
ZT13	76
ZT14	77	0.460292	0.476162	0.385384	0.535755	0.44513	0.487731	0.400854	0.373944	0.401211	0.472417	0.333193	0.36904	0.399146	0.428672
ZT15	78
ZT16	79	0.495706	0.451788	0.33433	0.50147	0.388535	0.441898	0.387337	0.358277	0.350251	0.409214	0.336312	0.314505	0.4565	0.44498
ZT17	80
ZT18	81	0.457975	0.3999	0.353619	0.517966	0.420559	0.496516	0.404763	0.300513	0.346438	0.3718	0.333217	0.279319	0.384202	0.411288
ZT19	82
ZT20	83	0.405832	0.271979	0.344434	0.465385	0.444593	0.380936	0.397915	0.313859	0.312458	0.387104	0.344332	0.361294	0.482306	0.437968
ZT21	84
ZT22	85	0.479368	0.46849	0.383186	0.508778	0.506457	0.477598	0.416272	0.313292	0.353712	0.398264	0.34244	0.30632	0.384728	0.450549
ZT23	86
ZT24	87	0.421288	0.346752	0.320048	0.432648	0.428465	0.345044	0.328626	0.299144	0.277954	0.355422	0.265541	0.331955	0.349879	0.400031
ZT1	88

## Sheet: 3F
Figure 3F - heat production
	Control							TeTx
Photoperiod	#6	#7	#8	#2	#13	#14	#9	#1	#11	#12	#16	#17	#18	#19
Dark	0.46	0.42	0.36	0.51	0.47	0.46	0.42	0.34	0.36	0.39	0.33	0.33	0.42	0.45
Light	0.35	0.3	0.3	0.4	0.37	0.33	0.33	0.31	0.34	0.4	0.31	0.34	0.4	0.4
Total	0.4	0.36	0.33	0.45	0.42	0.39	0.37	0.32	0.35	0.39	0.32	0.34	0.41	0.43

## Sheet: 3G
Figure 3E - 2h-binned RER		Control							TeTX
ZT	Time	#6	#7	#8	#2	#13	#14	#9	#1	#11	#12	#16	#17	#18	#19
ZT10	1	0.820807	0.846691	0.905722	0.918634	0.945816	0.91786	0.860958	0.829255	0.981581	0.927226	0.915649	0.915721	0.925764	0.943908
ZT11	2
ZT12	3	0.844774	0.837702	0.908034	0.878761	0.929863	0.894455	0.911393	0.874045	0.986264	0.926231	0.919116	0.938112	0.935293	0.943584
ZT13	4
ZT14	5	0.891986	0.877202	0.905702	0.931521	0.943919	0.914106	0.933859	0.899315	0.959813	0.904724	0.890107	0.92367	0.88279	0.921059
ZT15	6
ZT16	7	0.903624	0.868838	0.880973	0.909066	0.938945	0.942493	0.922145	0.873398	0.94707	0.834893	0.89697	0.878824	0.867217	0.902727
ZT17	8
ZT18	9	0.8747	0.878621	0.857204	0.927254	0.900741	0.937378	0.89913	0.879635	0.947833	0.781831	0.856764	0.841552	0.902982	0.917178
ZT19	10
ZT20	11	0.895334	0.768479	0.853186	0.847212	0.922268	0.869734	0.921969	0.898789	0.931647	0.773488	0.884492	0.873359	0.930588	0.895687
ZT21	12
ZT22	13	0.883042	0.867432	0.894571	0.867224	0.921092	0.925218	0.89545	0.883652	0.885802	0.814593	0.842836	0.886389	0.925379	0.889007
ZT23	14
ZT24	15	0.821278	0.836954	0.862807	0.807187	0.888769	0.856323	0.800118	0.870529	0.765621	0.835502	0.837377	0.848333	0.871032	0.840393
ZT1	16
ZT2	17	0.769088	0.769425	0.836796	0.828076	0.855781	0.838296	0.799338	0.878586	0.781949	0.839238	0.845307	0.822651	0.816875	0.856506
ZT3	18
ZT4	19	0.801363	0.776151	0.769923	0.766966	0.804413	0.825388	0.773155	0.885007	0.770799	0.828518	0.879812	0.78262	0.838328	0.835225
ZT5	20
ZT6	21	0.777022	0.7643	0.813332	0.78655	0.807956	0.840902	0.800412	0.810983	0.878607	0.853474	0.866794	0.854722	0.899031	0.84606
ZT7	22
ZT8	23	0.786431	0.808617	0.843584	0.777962	0.827727	0.851311	0.814982	0.825305	0.954069	0.857688	0.885674	0.883907	0.930201	0.903901
ZT9	24
ZT10	25	0.815826	0.835788	0.826179	0.852746	0.872629	0.8879	0.856475	0.87288	0.97653	0.905649	0.923654	0.931218	0.929267	0.918435
ZT11	26
ZT12	27	0.81439	0.858418	0.88564	0.868599	0.925223	0.933689	0.871982	0.933548	0.966816	0.920113	0.947061	0.947954	0.910988	0.947956
ZT13	28
ZT14	29	0.921448	0.91645	0.89472	0.925537	0.921011	0.952478	0.910505	0.921286	0.973678	0.912584	0.947242	0.922625	0.867184	0.891644
ZT15	30
ZT16	31	0.925918	0.907941	0.8878	0.920066	0.939369	0.954119	0.937534	0.933489	0.962021	0.842497	0.923148	0.90535	0.849017	0.829359
ZT17	32
ZT18	33	0.904502	0.876564	0.804586	0.8611	0.90157	0.939126	0.899533	0.863858	0.951499	0.815734	0.884379	0.877552	0.884346	0.847557
ZT19	34
ZT20	35	0.905395	0.813423	0.822003	0.855161	0.916556	0.918837	0.902063	0.841511	0.862144	0.809189	0.869788	0.874187	0.906044	0.865449
ZT21	36
ZT22	37	0.924356	0.88069	0.868088	0.875907	0.902633	0.91934	0.890971	0.808691	0.771732	0.815236	0.868462	0.830488	0.823783	0.862887
ZT23	38
ZT24	39	0.864774	0.760975	0.81068	0.82537	0.864192	0.838528	0.773025	0.862828	0.761104	0.83268	0.876577	0.869432	0.808378	0.824149
ZT1	40
ZT2	41	0.799435	0.73694	0.772844	0.760575	0.854475	0.775077	0.754774	0.835769	0.717826	0.805238	0.850511	0.878961	0.75584	0.75926
ZT3	42
ZT4	43	0.791928	0.753247	0.767057	0.746279	0.790117	0.79657	0.777944	0.811309	0.780196	0.779278	0.833689	0.92155	0.799387	0.811951
ZT5	44
ZT6	45	0.78071	0.727073	0.796954	0.760708	0.761967	0.811048	0.811355	0.79494	0.851063	0.81254	0.859205	0.927132	0.819039	0.79623
ZT7	46
ZT8	47	0.786467	0.738499	0.819159	0.786097	0.815423	0.827887	0.810652	0.784057	0.945699	0.882642	0.860656	0.887707	0.891199	0.83028
ZT9	48
ZT10	49	0.815287	0.854398	0.858768	0.827394	0.823535	0.88348	0.833261	0.857561	0.966451	0.879069	0.905303	0.895753	0.91656	0.922305
ZT11	50
ZT12	51	0.880879	0.826626	0.876796	0.863868	0.869013	0.901905	0.898796	0.91061	0.967359	0.91455	0.910427	0.912553	0.905411	0.915018
ZT13	52
ZT14	53	0.919361	0.917489	0.890562	0.917785	0.91155	0.947956	0.940866	0.928538	0.942465	0.884045	0.910011	0.903039	0.885887	0.92733
ZT15	54
ZT16	55	0.877077	0.919247	0.867605	0.921698	0.896802	0.951296	0.949459	0.932921	0.835876	0.847042	0.860033	0.891047	0.875764	0.921327
ZT17	56
ZT18	57	0.879382	0.864063	0.822095	0.892495	0.883294	0.92815	0.921221	0.886356	0.856514	0.795034	0.826942	0.867501	0.881352	0.892129
ZT19	58
ZT20	59	0.87053	0.810668	0.851901	0.875291	0.900829	0.927774	0.91118	0.824865	0.902782	0.848371	0.901327	0.868349	0.865711	0.851121
ZT21	60
ZT22	61	0.891829	0.847156	0.87575	0.853315	0.90954	0.928758	0.888145	0.80917	0.907374	0.840544	0.88273	0.870688	0.84859	0.842488
ZT23	62
ZT24	63	0.838003	0.786831	0.818578	0.822833	0.791281	0.815665	0.797624	0.757793	0.934281	0.794986	0.83836	0.805437	0.829757	0.803365
ZT1	64
ZT2	65	0.849871	0.771119	0.770863	0.771376	0.710295	0.82038	0.771685	0.738085	0.823552	0.818318	0.801469	0.82339	0.764161	0.758336
ZT3	66
ZT4	67	0.779015	0.740199	0.754145	0.724447	0.748936	0.830571	0.813308	0.712106	0.743965	0.775144	0.816606	0.828522	0.861563	0.780318
ZT5	68
ZT6	69	0.751435	0.686938	0.787013	0.735678	0.751535	0.844774	0.782534	0.744236	0.795413	0.842461	0.816435	0.894046	0.910178	0.810437
ZT7	70
ZT8	71	0.745971	0.714899	0.797531	0.763325	0.79965	0.862394	0.821132	0.787691	0.869535	0.858725	0.895534	0.915435	0.887459	0.851883
ZT9	72
ZT10	73	0.799188	0.766119	0.825866	0.81256	0.831144	0.895594	0.852301	0.876747	0.953953	0.910413	0.924775	0.928907	0.915208	0.895465
ZT11	74
ZT12	75	0.830119	0.783783	0.861683	0.863521	0.878239	0.876169	0.873984	0.926506	0.965649	0.897134	0.936944	0.918525	0.889111	0.93584
ZT13	76
ZT14	77	0.902136	0.876681	0.893631	0.917966	0.905588	0.938384	0.931017	0.919697	0.941264	0.878101	0.917357	0.909443	0.881842	0.915534
ZT15	78
ZT16	79	0.924358	0.920129	0.897871	0.918554	0.892291	0.953797	0.936337	0.933547	0.889562	0.856708	0.892791	0.869975	0.902504	0.861855
ZT17	80
ZT18	81	0.903712	0.890163	0.892106	0.895615	0.858605	0.948142	0.91814	0.895338	0.812318	0.857543	0.897696	0.842214	0.897898	0.874998
ZT19	82
ZT20	83	0.859229	0.785134	0.884127	0.883453	0.891056	0.881268	0.89803	0.860533	0.845757	0.816494	0.880252	0.850074	0.883095	0.879066
ZT21	84
ZT22	85	0.889756	0.852778	0.879653	0.881572	0.892966	0.917125	0.893024	0.847471	0.792233	0.828611	0.879359	0.861896	0.816766	0.839868
ZT23	86
ZT24	87	0.847972	0.763068	0.77941	0.828759	0.836265	0.834047	0.797947	0.845719	0.745255	0.812619	0.872123	0.835015	0.862168	0.787522
ZT1	88

## Sheet: 3H
Figure 3F - RER
	Control							TeTx
Photoperiod	#6	#7	#8	#2	#13	#14	#9	#1	#11	#12	#16	#17	#18	#19
Dark	0.9	0.87	0.87	0.89	0.91	0.93	0.92	0.88	0.9	0.84	0.89	0.88	0.88	0.88
Light	0.8	0.78	0.82	0.8	0.82	0.85	0.81	0.83	0.87	0.85	0.87	0.88	0.86	0.85
Total	0.85	0.82	0.84	0.85	0.87	0.89	0.86	0.86	0.88	0.84	0.88	0.88	0.87	0.87
