# Supplementary material for: Leptin receptor neurons in the dorsomedial hypothalamus regulate diurnal patterns of feeding, locomotion, and metabolism
Source: eLife. 2021 Feb 2;10:e63671. doi: 10.7554/eLife.63671 (PMC7880681; doi:10.7554/eLife.63671)
Supplement: Figure 4—source data 1. [file elife-63671-fig4-data1.xlsx]

## Sheet: 4B
4B - TRF calorimetry	Control							TeTx
Time	#6	#7	#8	#2	#13	#14	#9	#1	#11	#12	#16	#17	#18	#19
1	0.564245	0.596028	0.6963	0.653091	0.73407	0.647266	0.0383046	0.81117	0.489384	0.42586	0.587774	0.143983	0.918625	0.42536
2
3	0.575907	1.28432	0.67035	0.87532	0.860926	0.807422	0.766825	0.722459	0.004547	0.513278	0.340668	0.635792	0.825528	0.381117
4
5	0.86616	0.484773	0.531903	0.70005	0.369542	0.616637	1.0474	0.564253	0.036676	0.142275	0.110244	0.719371	0.021828	0.3199
6
7	0.391478	0.380852	0.487523	0.696438	1.41472	0.557757	0.045418	0.643821	0.187897	0.129776	0.34157	0.212168	0.727036	1.09533
8
9	1.285	0.953577	1.4716	0.644565	0.461238	1.14169	0.326031	0.361928	0.166639	0.085177	0.486797	0.281614	0.933267	0
10
11	0	0.004771	0.00318	0	0	0	0	0	0	0	0	0	0	0
12
13	0	0	0	0	0	0	0	0	0	0	0	0	0	0
14
15	0	0	0	0	0	0	0	0	0	0	0	0	0	0
16
17	0	0	0	0	0	0	0	0	0	0	0	0	0	0
18
19	0	0	0	0	0	0	0	0	0	0	0	0	0	0
20
21	0	0	0	0	0	0	0	0	0	0	0	0	0	0
22
23	0.253217	0.590484	0.361405	0.480759	0.16339	0.493519	0.476246	0.333466	1.28406	0.730863	0.409777	0.776226	0.842244	0.04027
24
25	1.2008	0.540997	0.739747	0.777182	0.946726	0.812087	0.807095	1.24415	0.189513	0.621132	0.63331	0.760088	0.167734	0.868331
26
27	0.199217	0.167838	0.696751	0.190562	0.530662	1.32583	1.30436	0.425508	0.517157	0.768341	0.069549	0.314692	0.4545	0.237355
28
29	1.20892	0.681281	0.246326	0.041559	0.805658	0.252321	0.055704	0.275451	0.499695	0.111285	0.450159	0.465258	0.330872	0.222678
30
31	0.185449	0.544003	0.441732	0.106209	0.238558	0.546371	0.497522	0.808345	1.00482	0.189032	0.973355	0.325322	0.64923	0.450457
32
33	0.722322	0.900656	1.06608	0.498772	0.597148	0.738468	0.373079	0.11856	0	0.31392	0	0.525404	0.951869	0.372187
34
35	0	0	0	0	0	0	0	0	0	0	0	0	0	0
36
37	0	0	0	0	0	0	0	0	0	0	0	0	0	0
38
39	0	0	0	0	0	0	0	0	0	0	0	0	0	0
40
41	0	0	0	0	0	0	0	0	0	0	0	0	0	0
42
43	0	0	0	0	0	0	0	0	0	0	0	0	0	0
44
45	0	0	0	0	0	0	0	0	0	0	0	0	0	0
46
47	0.466368	0.748763	0.542803	0.22031	0.490266	0.205819	0.445032	0.494311	0.738731	0	0.379543	0.878992	0.478203	0.044196
48
49	1.39705	0.994969	0.742951	0.857423	1.61922	1.40923	0.940759	0.983768	0.717749	0.030349	0.701038	0.599995	0.554272	0.691152
50
51	0.41626	0.953631	0.535924	0.711173	0.09969	0.84088	1.15874	0.313041	0.72754	0.002023	0.196511	0.855163	0.331831	0.31606
52
53	1.3482	0.79839	0.00618	0.953773	0.2271	0.64319	0.51617	0.636358	0.291998	0.322659	0.105226	0.222511	0.582484	0.21095
54
55	0	0.35293	0.10508	0.571724	0.62664	1.32078	0.291052	0.221073	0.996297	0.586084	0.648589	0.283087	1.01908	0.608374
56
57	0.95659	0.56674	0.74232	0.83849	0.3313	0.23964	0.28343	0.873768	0	0.633498	0.673925	0.488478	0.03813	0.101552
58
59	0	0	0	0	0	0	0	0	0	0	0	0	0	0
60
61	0	0	0	0	0	0	0	0	0	0	0	0	0	0
62
63	0	0	0	0	0	0	0	0	0	0	0	0	0	0
64
65	0	0	0	0	0	0	0	0	0	0	0	0	0	0
66
67	0	0	0	0	0	0	0	0	0	0	0	0	0	0
68
69	0	0	0	0	0	0	0	0	0	0	0	0	0	0
70
71	0.60376	0.69826	0.54641	0.49389	0.74473	0.41044	0.367217	0.49746	0.721531	0.151565	0.41512	0.674084	0.73087	0.064495
72
73	0.65479	1.39267	1.36251	0.86388	0.60504	1.15313	0.73391	0.33817	0.732257	0.496618	0.807074	0.999624	0.54724	0.774297
74
75	1.05029	0.71818	0.22236	1.00593	0.70142	1.10164	0.69013	0.15952	0.46399	0.32786	0.452867	0.63512	0.20761	0.308712
76
77	1.24858	0.10557	0.4061	0.69575	0.48031	0.27748	0.76659	1.02739	0.39064	0.240206	0.484852	1.00619	0.20737	0.704949
78
79	0.06536	0.43813	0.4272	0.11061	1.19653	0.60796	0.49638	0	0	0.337253	0.79157	0.00496	0.69739	0.247825
80
81	0.79174	1.06858	0.31961	0.52431	0.44641	0.54716	0.68058	0.51439	0	0	0.14002	0.36568	0.52794	0.355862
82
83	0	0.08588	0.0034	0	0	0.14738	0	0	0	0	0	0	0	0
84
85	0	0	0	0	0	0	0	0	0	0	0	0	0	0
86
87	0	0	0	0	0	0	0	0	0	0	0	0	0	0
88
89	0	0	0	0	0	0	0	0	0	0	0	0	0	0
90
91	0	0	0	0	0	0	0	0	0	0	0	0	0	0
92
93	0	0	0	0	0	0	0	0	0	0	0	0	0	0
94
95	0.44693	0.56627	0.64683	0.69275	0.39209	0.29538	0.46326	0.75898	0	0.857694	0.67669	0	0.81159	0
96
97	1.03734	0.55059	0.68789	0.72895	1.42707	1.52729	0.66525	1.00321	0	0.662288	1.11624	0	0.75049	0.29226
98
99	1.23623	0.92764	1.11168	0.55836	1.51524	0.26062	0.9366	0.0069	0.46279	0.217664	0.12667	0.7336	0	0.44954
100
101	0.76748	0.89838	0	0.69792	0.70051	0.84258	0.53314	0.25881	0.90085	0.58355	0.98928	0.68214	0.46554	0.36032
102
103	0.31407	0.71996	0.65048	0.41822	0.58934	0.79317	0.53906	0.43806	0.00411	0.50772	0	0	0.95613	0.503
104
105	0.22443	0.53975	0.35856	0.46944	0.14977	0.8167	0.25579	0.57012	0.01316	1.03765	0.04677	0.32667	0.1733	0.19775
106
107	0.20441	0.03421	0.26163	0.49896	0	0	0	0.38627	0	0	0.30591	0.29043	0	0.78617
108
109	0	0.22248	0.62792	0.17047	0	0	0.16303	0.69425	0	0	0.13473	0.89356	0.16567	0
110
111	0.0897	0.19745	0.00512	0.30564	0	0.08239	0	0	0	0.06056	0.1641	0.05906	0.29018	0.00837
112
113	0.28777	0.86754	0.01575	0.00595	0	0.24716	0.15999	0.51076	1.17511	0.39358	0.94916	0.23685	0.31986	0.27365
114
115	0.21596	0	0	0.06194	0.06401	0.08225	1.05358	0	0.01046	0.54299	0	0.45181	1.00357	0.24697
116
117	0.06873	0.03924	0.1099	0.05787	0.3554	0.20949	0	0.54429	0.21974	0.50008	0.27675	0.46839	0.00216	0.35644
118
119	0.76067	0.21694	1.36672	0.41591	0.32954	0.70696	0.13631	1.50138	0.65144	0.39263	0.94352	0.55379	0.45649	0.60247
120
121	0.41565	1.31675	0.24667	0.90809	0.3168	1.42431	0.6768	0.05194	0.30327	1.12483	0.29616	0.91249	0.48954	0.5549
122
123	0.48949	0.54143	0.30838	0.85705	0.7255	0.2501	0.83594	0.47861	0	0.00364	0.20538	0	0.61121	0.56335
124
125	0.69515	0.36419	0.38979	0.37216	0.90742	0.3448	0.60412	0.30902	0	0.33413	0.31537	0.27162	0.22105	0.79256
126
127	0.65187	0.45583	0.6181	0.28751	1.3056	0.52157	0.31088	0.33066	0	0.5007	0.05895	0.3976	1.06042	0.00882
128
129	0.23718	0.03892	0.29339	0.66206	0.19654	0.12196	0	0.64202	0.1306	0.46504	0.78722	0.16693	0	0.08634
130
131	0	0	0.14038	0	0	0.0434	0	0.01587	0.01037	0.20589	0	0.38149	0.05067	0.29572
132
133	0	0.0728	0.15884	0.04114	0	0.1235	0.18454	0.1638	0.19619	0	0	0.73909	0	0.19207
134
135	0.11627	0.01712	0.21876	0.22077	0	0	0	0	0.20536	0.19794	0	0	0.17573	0.17698
136
137	0	0	0.39845	0	0	0.21323	0.14402	0.00744	0.16166	0.15806	0	0	0.244	0.22781
138
139	0	0.06348	0	0.11837	0.2021	0.27216	0.13879	0.28589	0.46145	0.53426	0.45447	0.31831	0.14882	0.47519
140
141	0.63394	0.04245	0	0.23134	0.09924	0.13189	0.74538	0.31009	0.7495	0.42556	0.40984	0.50886	0.76721	0.23824
142
143	0.21393	0.47432	0.38061	1.06027	0.50754	0.61843	0.08637	1.03993	0.73126	1.00388	0.64443	0.5895	0.32879	0.77786
144
145	0.6652	0.58718	0.72057	0.21899	0.49783	0.57903	0.48528	0.68796	0.00218	0.17617	0.67578	0.80469	0.58431	0.12448
146
147	0.771	0.72799	0.31961	1.04334	0.65581	0.58376	0.70515	0.89626	0.18155	0.47779	0.1911	0.90608	0.54612	0.4957
148
149	0.27246	0.97062	0.36635	0.11047	1.10227	1.13277	0.47073	0.0249	0.78444	1.12021	0.11781	0.06527	0.19898	0.58019
150
151	0.56357	0.27553	0.93346	0.28039	0.53896	0.04488	0.31978	0.24445	0	0	0.68103	0.21695	0.70979	0.41191
152
153	0.07594	0.36987	0.29441	0.26394	0.04885	0.08144	0.25317	0.10535	0.00561	0.02626	0	0.36755	0.24367	0.13236
154

## Sheet: 4C
4C - photoperiod averaged food intake from B	Control							TeTx
Light: TRF	0	0	0	0	0	0	0	0	0	0	0	0	0	0
Dark: TRF	4.42	4.03	3.36	3.43	4.01	4.36	3.22	3.07	2.15	1.9	2.62	2.77	3.03	2.29
Light: ad lib	1.25	0.95	1.27	1.5	0.48	0.97	1.3	2.53	2.14	2.81	2.02	2.91	1.93	1.88
Dark: ad lib	2.78	3.36	3.2	3.05	3.66	3.4	2.78	2.93	1.03	2.23	2.01	2.32	2.62	2.79

## Sheet: 4D
4D - total daily intake in TRF relative to ad lib	Control							TeTx
	#6	#7	#8	#2	#13	#14	#9	#1	#11	#12	#16	#17	#18	#19
TRF	4.42	4.03	3.36	3.43	4.01	4.36	3.22	3.07	2.15	1.9	2.62	2.77	3.03	2.29
ad lib	4.03	4.32	4.47	4.55	4.15	4.37	4.08	5.46	3.16	5.05	4.02	5.23	4.55	4.67
